# Supplementary material for: Massively parallel sequencing of micro-manipulated cells targeting a comprehensive panel of disease-causing genes: A comparative evaluation of upstream whole-genome amplification methods
Source: PubMed Central journal article supplement (PMC5919401; doi:10.1371/journal.pone.0196334), 2018-04-26
Supplement: pone.0196334.s002.pdf [file pone.0196334.s002.pdf]

**S1 Table. SNP detection concordance between replicates per WGA method.**

|            | Replicate | Number of SNP's | Common SNP's | % of total SNP's | Number of TP | Common TP | % of total TP | Number of FP | Common FP | % of total FP |
|------------|-----------|-----------------|--------------|------------------|--------------|-----------|---------------|--------------|-----------|---------------|
| Bulk DNA-1 | 1         | 7591            | 7383         | 97.3             | 7480         | 7326      | 97.9          | 111          | 57        | 51.4          |
| Bulk DNA-2 | 2         | 7585            | 7383         | 97.3             | 7477         | 7326      | 98.0          | 108          | 57        | 52.8          |
| Bulk DNA-3 | 3         | 7619            | 7383         | 96.9             | 7501         | 7326      | 97.7          | 118          | 57        | 48.3          |
| Bulk DNA-4 | 4         | 7595            | 7383         | 97.2             | 7479         | 7326      | 98.0          | 116          | 57        | 49.1          |
| Average±SD |           |                 |              | 97.2±0.19        |              |           | 97.9±0.14     |              |           | 50.4±2.07     |
| Ampli1-1   | 1         | 5916            | 3053         | 51.6             | 4415         | 2979      | 67.5          | 1501         | 74        | 4.9           |
| Ampli1-2   | 2         | 4666            | 3053         | 65.4             | 3762         | 2979      | 79.2          | 904          | 74        | 8.2           |
| Ampli1-3   | 3         | 4410            | 3053         | 69.2             | 3642         | 2979      | 81.8          | 768          | 74        | 9.6           |
| Average±SD |           |                 |              | 62.1±9.26        |              |           | 76.2±7.61     |              |           | 7.6±2.41      |
| Malbac-1   | 1         | 9133            | 2339         | 25.6             | 3057         | 2316      | 75.8          | 6076         | 23        | 0.4           |
| Malbac-2   | 2         | 7174            | 2339         | 32.6             | 4647         | 2316      | 49.8          | 2527         | 23        | 0.9           |
| Malbac-3   | 3         | 8842            | 2339         | 26.5             | 4665         | 2316      | 49.6          | 4177         | 23        | 0.6           |
| Average±SD |           |                 |              | 28.2±3.81        |              |           | 58.4±15.07    |              |           | 0.6±0.25      |
| RepliG-1   | 1         | 7305            | 6755         | 92.5             | 6980         | 6688      | 95.8          | 325          | 67        | 20.6          |
| RepliG-2   | 2         | 7401            | 6755         | 91.3             | 7199         | 6688      | 92.9          | 202          | 67        | 33.2          |
| RepliG-3   | 3         | 7379            | 6755         | 91.5             | 7229         | 6688      | 92.5          | 150          | 67        | 44.7          |
| Average±SD |           |                 |              | 91.8±0.64        |              |           | 93.7±1.80     |              |           | 32.8±12.05    |
| SurePlex-1 | 1         | 8105            | 3393         | 41.9             | 4755         | 3376      | 71.0          | 3350         | 17        | 0.5           |
| SurePlex-2 | 2         | 7867            | 3393         | 43.1             | 4381         | 3376      | 77.1          | 3486         | 17        | 0.5           |
| SurePlex-3 | 3         | 7541            | 3393         | 45.0             | 4679         | 3376      | 72.2          | 2862         | 17        | 0.6           |
| SurePlex-4 | 4         | 6458            | 3393         | 52.5             | 4979         | 3376      | 67.8          | 1479         | 17        | 1.1           |
| SurePlex-5 | 5         | 7537            | 3393         | 45.0             | 4729         | 3376      | 71.4          | 2808         | 17        | 0.6           |
| Average±SD |           |                 |              | 45.5±4.13        |              |           | 71.9±3.35     |              |           | 0.7±0.25      |
