# Supplementary material for: Massively parallel sequencing of micro-manipulated cells targeting a comprehensive panel of disease-causing genes: A comparative evaluation of upstream whole-genome amplification methods
Source: PubMed Central journal article supplement (PMC5919401; doi:10.1371/journal.pone.0196334), 2018-04-26
Supplement: pone.0196334.s003.pdf [file pone.0196334.s003.pdf]

**S2 Table. Allele dropout estimations.** The maximum number of ADOs were calculated by summing following two situations that could have been caused by ADO: (1) SNP's that were not called in the samples due to lack of sequencing data (Table 2, 'No data in sample'). (2) SNP's that are heterozygous in the reference, but were called homozygous in the samples.

| Sample            | Total SNP in reference | Homozygous miscall | No data in sample | Estimated ADO count | Estimated ADO percent |
|-------------------|------------------------|--------------------|-------------------|---------------------|-----------------------|
| <i>Bulk DNA-1</i> | 7764                   | 232                | 32                | 264                 | 3.4                   |
| <i>Bulk DNA-2</i> | 7764                   | 238                | 31                | 269                 | 3.5                   |
| <i>Bulk DNA-3</i> | 7764                   | 216                | 37                | 253                 | 3.3                   |
| <i>Bulk DNA-4</i> | 7764                   | 231                | 32                | 263                 | 3.4                   |
| <i>Ampli1-1</i>   | 7764                   | 1513               | 1832              | 3345                | 43.1                  |
| <i>Ampli1-2</i>   | 7764                   | 1258               | 2675              | 3933                | 50.7                  |
| <i>Ampli1-3</i>   | 7764                   | 1216               | 2811              | 4027                | 51.9                  |
| <i>Malbac-1</i>   | 7764                   | 3140               | 1538              | 4678                | 60.3                  |
| <i>Malbac-2</i>   | 7764                   | 1486               | 1493              | 2979                | 38.4                  |
| <i>Malbac-3</i>   | 7764                   | 1606               | 1440              | 3046                | 39.2                  |
| <i>RepliG-1</i>   | 7764                   | 648                | 141               | 789                 | 10.2                  |
| <i>RepliG-2</i>   | 7764                   | 434                | 113               | 547                 | 7.0                   |
| <i>RepliG-3</i>   | 7764                   | 422                | 97                | 519                 | 6.7                   |
| <i>SurePlex-1</i> | 7764                   | 1439               | 1481              | 2920                | 37.6                  |
| <i>SurePlex-2</i> | 7764                   | 1604               | 1672              | 3276                | 42.2                  |
| <i>SurePlex-3</i> | 7764                   | 1438               | 1529              | 2967                | 38.2                  |
| <i>SurePlex-4</i> | 7764                   | 1324               | 1261              | 2585                | 33.3                  |
| <i>SurePlex-5</i> | 7764                   | 1652               | 1185              | 2837                | 36.5                  |
